# Supplementary material for: Fast and efficient synthesis of a host guest system: a mechanochemical approach
Source: Royal Society of Chemistry journal article supplement (doi:10.1039/c5ce01868d), 2016-01-01
Supplement: c5ce01868d1.pdf [file c5ce01868d1.pdf]

# Supporting Information - Fast and efficient synthesis of a host guest system: a mechanochemical approach

Manuel Wilke<sup>1, 2</sup>, Maria Klimakow<sup>1, 2</sup>, Klaus Rademann<sup>2</sup>, and Franziska Emmerling\*<sup>1</sup>

<sup>1</sup>*BAM Federal Institute for Materials Research and Testing  
Richard-Willstätter-Strasse 11, 12489 Berlin, Germany*

<sup>2</sup>*Department of Chemistry, Humboldt-Universität zu Berlin,  
Brook-Taylor-Str. 2, 12489 Berlin, Germany*

January 13, 2016

## Experimental part:

Since the base ((CH<sub>3</sub>)<sub>4</sub>NOH) was not used in the presented synthesis of NENU-5, the chemical composition of our product is different from the one given for NENU-5 ([Cu<sub>2</sub>(BTC)<sub>4/3</sub>(H<sub>2</sub>O)<sub>2</sub>]<sub>6</sub>[HPMo<sub>12</sub>O<sub>40</sub>] · (C<sub>4</sub>H<sub>12</sub>N)<sub>2</sub> · xH<sub>2</sub>O, with x = 25-30).<sup>1</sup> Taking into account the relative humidity, the reactants, and the charge balance, the formula can be given as [Cu<sub>2</sub>(BTC)<sub>4/3</sub>(H<sub>2</sub>O)<sub>x</sub>]<sub>6</sub>[H<sub>3</sub>PMo<sub>12</sub>O<sub>40</sub>] · yH<sub>2</sub>O (x = 0-2, y = 39-41).

The ratio of the Keggin-type POM in the HKUST-1 network was confirmed by X-ray fluorescence (XRF) analysis. The values are given in Table S1. In the XRF measurements, the heavy elements were analysed. The measurements were conducted with a Niton XL3t GOLDD+ Analyzer (Thermo scientific, USA) and the sample was used without further preparation.

Based on nitrogen adsorption measurements of the raw product, the specific surface area was determined to 218 m<sup>2</sup> g<sup>-1</sup>. The isotherms of the adsorption and desorption are shown in Figure S5. The measured surface area corresponds to 28.7% of the BET specific surface area of the raw product of the mechanochemical synthesis of HUKST-1 (758 m<sup>2</sup> g<sup>-1</sup>).<sup>2</sup> Before the measurement, the sample was heated up to 200 °C at 5 mbar for 16 hours.

Thermogravimetric (TG) measurements showed a weight loss 15.7% in the range from room temperature to 200 °C. This weight loss corresponds to 43 molecules of water. Further heating to 300 °C results in an additional mass loss of 6.4% most probably attributed to traces of acetic acid in the pores (Figure S7).

---

\*Corresponding author

E-mail: franziska.emmerling@bam.de

Phone: +49-30-8104-1133

Fax: +49-30-8104-1137

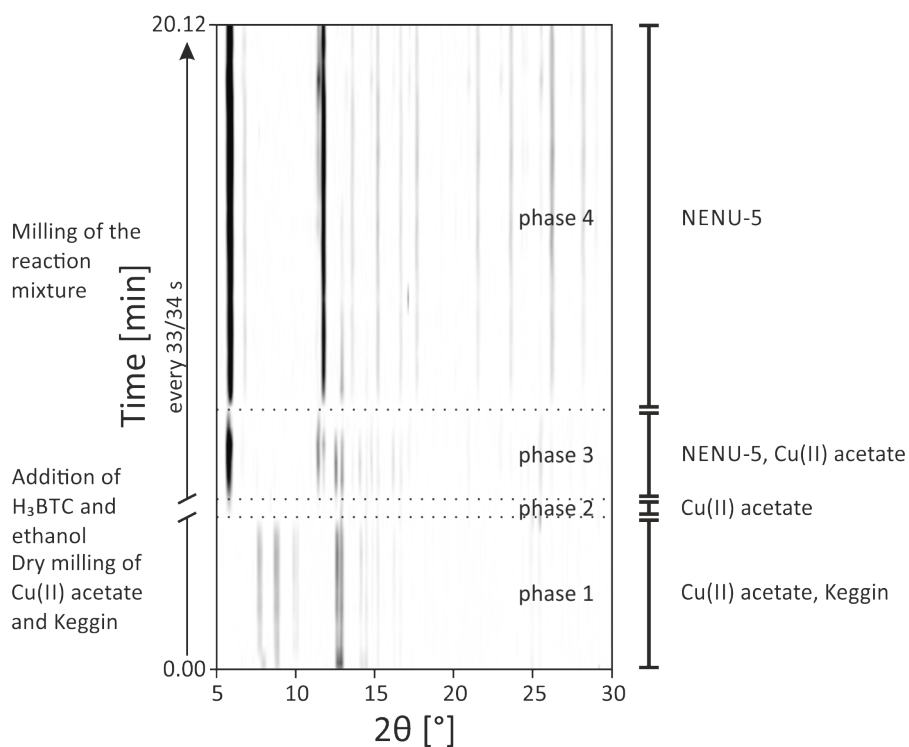

Figure S1: 2D plot of synchrotron XRD data for the mechanochemical synthesis of NENU-5 at 30 Hz including a pre-milling step (5 min) of copper(II)-acetate monohydrate and the Keggin-type POM (reaction 1). A description of the reaction procedure and the detected compounds is given; Cu(II) acetate = copper(II) acetate monohydrate, Keggin =  $\text{H}_3\text{PMo}_{12}\text{O}_{40}\cdot 13\text{H}_2\text{O}$ ,  $\text{H}_3\text{BTC}$  = 1,3,5-benzenetricarboxylic acid.

Table 1: Ratio of copper and molybdenum in the mechanochemical synthesised NENU-5 (XRF analysis).

| measurement | ratio Cu [%] | ratio Mo [%] |
|-------------|--------------|--------------|
| 1           | 48.7         | 51.1         |
| 2           | 48.7         | 51.1         |
| 3           | 48.8         | 51.0         |

## References

- [1] C. Y. Sun, S. X. Liu, D. D. Liang, K. Z. Shao, Y. H. Ren and Z. M. Su, *J. Am. Chem. Soc.*, 2009, **131**, 1883–1888.
- [2] M. Klimakow, P. Klobes, K. Rademann and F. Emmerling, *Microporous Mesoporous Mater.*, 2012, **154**, 113–118.

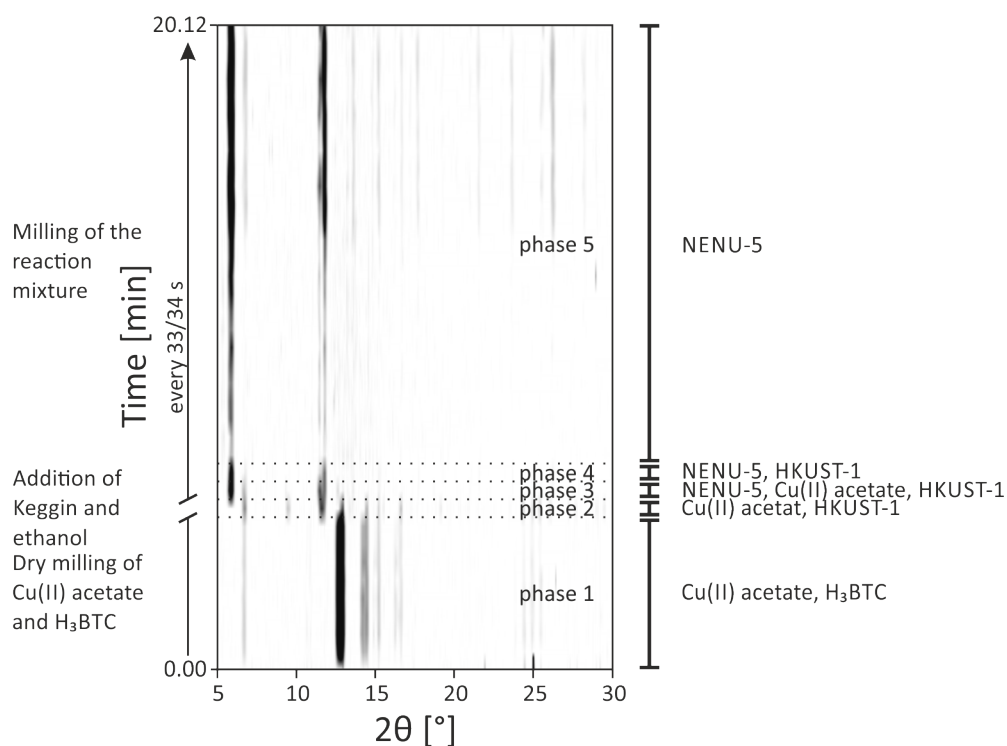

Figure S2: 2D plot of synchrotron XRD data for the mechanochemical synthesis of NENU-5 at 30 Hz including a pre-milling step (5 min) of copper(II)-acetate monohydrate and BTC (reaction 2). A description of the reaction procedure and the detected compounds is given; Cu(II) acetate = copper(II) acetate monohydrate, Keggin =  $\text{H}_3\text{PMo}_{12}\text{O}_{40} \cdot 13\text{H}_2\text{O}$ ,  $\text{H}_3\text{BTC}$  = 1,3,5-benzenetricarboxylic acid.

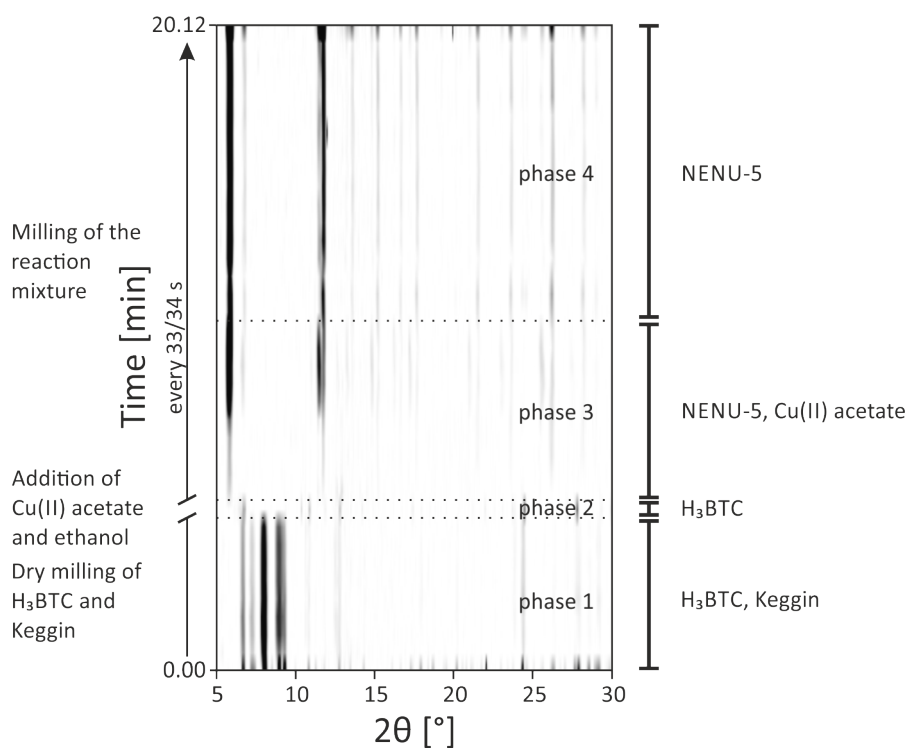

Figure S3: 2D plot of synchrotron XRD data for the mechanochemical synthesis of NENU-5 at 30 Hz including a pre-milling step (5 min) of BTC and the Keggin-type POM (reaction 3). A description of the reaction procedure and the detected compounds is given; Cu(II) acetate = copper(II) acetate monohydrate, Keggin =  $\text{H}_3\text{PMo}_{12}\text{O}_{40}\cdot 13\text{H}_2\text{O}$ , H<sub>3</sub>BTC = 1,3,5-benzenetricarboxylic acid.

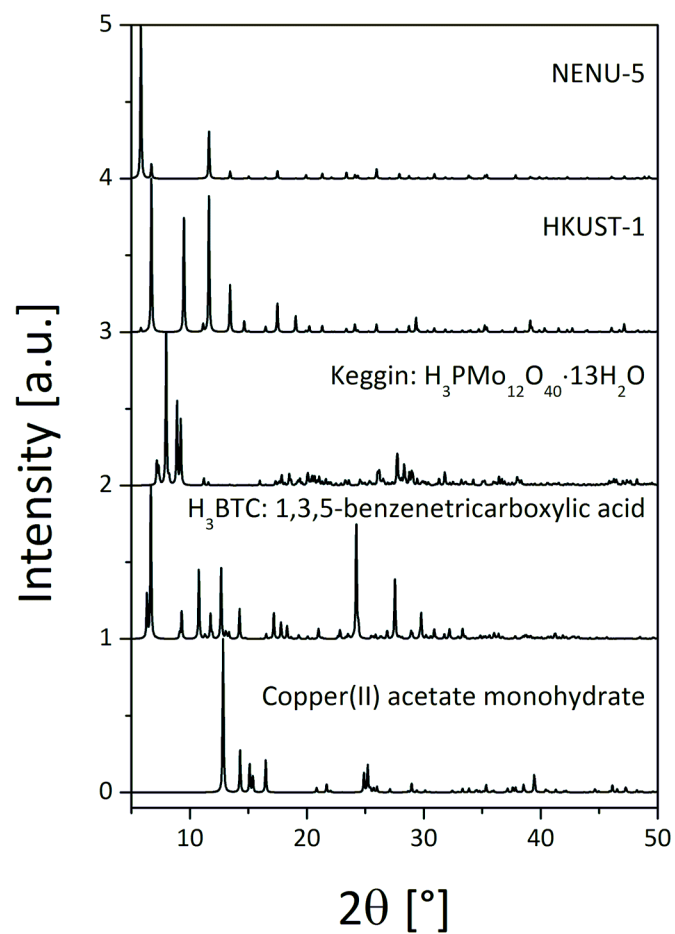

Figure S4: Calculated diffraction patterns of NENU-5, HKUST-1, the Keggin-type POM  $\text{H}_3\text{PMo}_{12}\text{O}_{40}\cdot 13\text{H}_2\text{O}$ , 1,3,5-benzenetricarboxylic acid, and copper(II) acetate monohydrate.

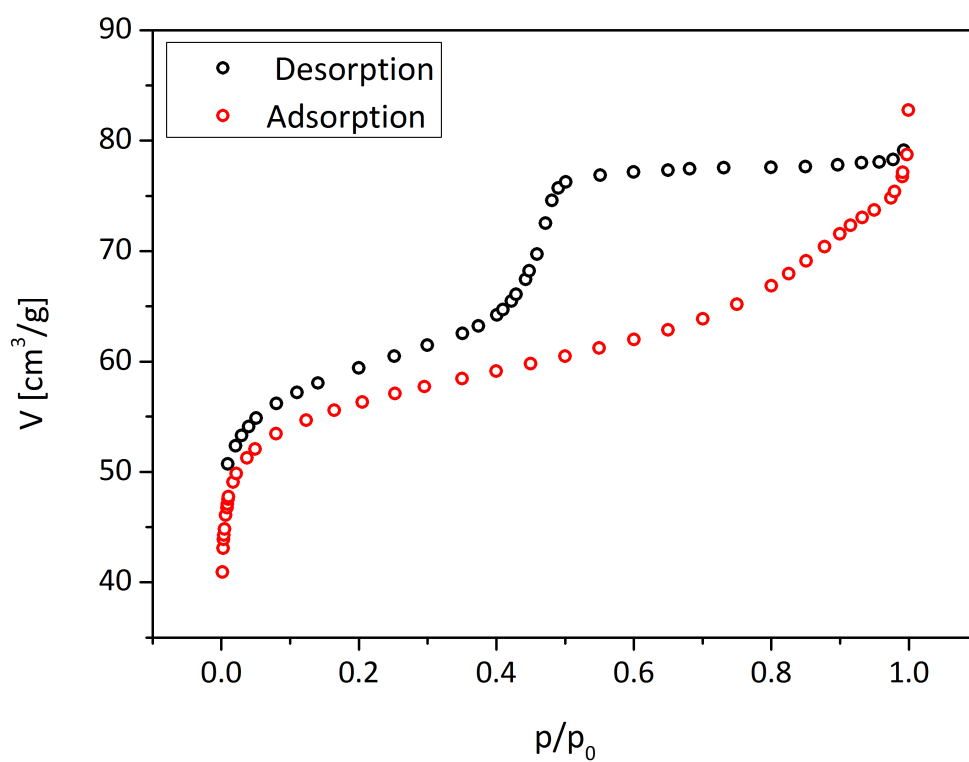

Figure S5: Adsorption and desorption isotherms for nitrogen at 77 K of mechanochemically synthesised NENU-5.

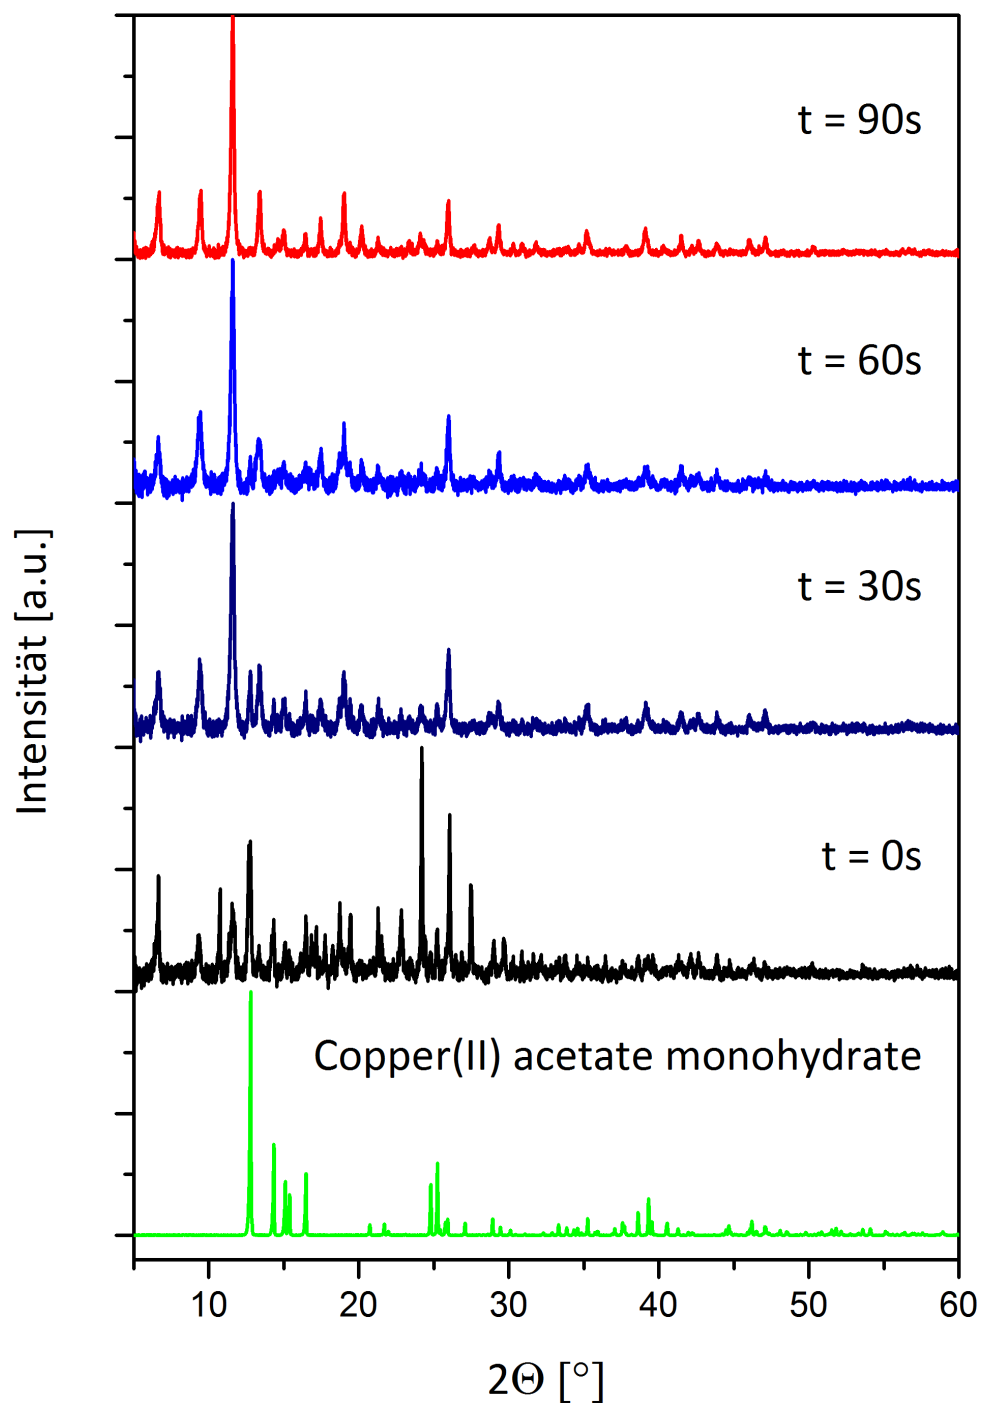

Figure S6: Diffraction pattern of the *ex situ* investigation of the mechanochemical synthesis of HKUST-1 including a pre-milling step of copper(II) acetate monohydrate.

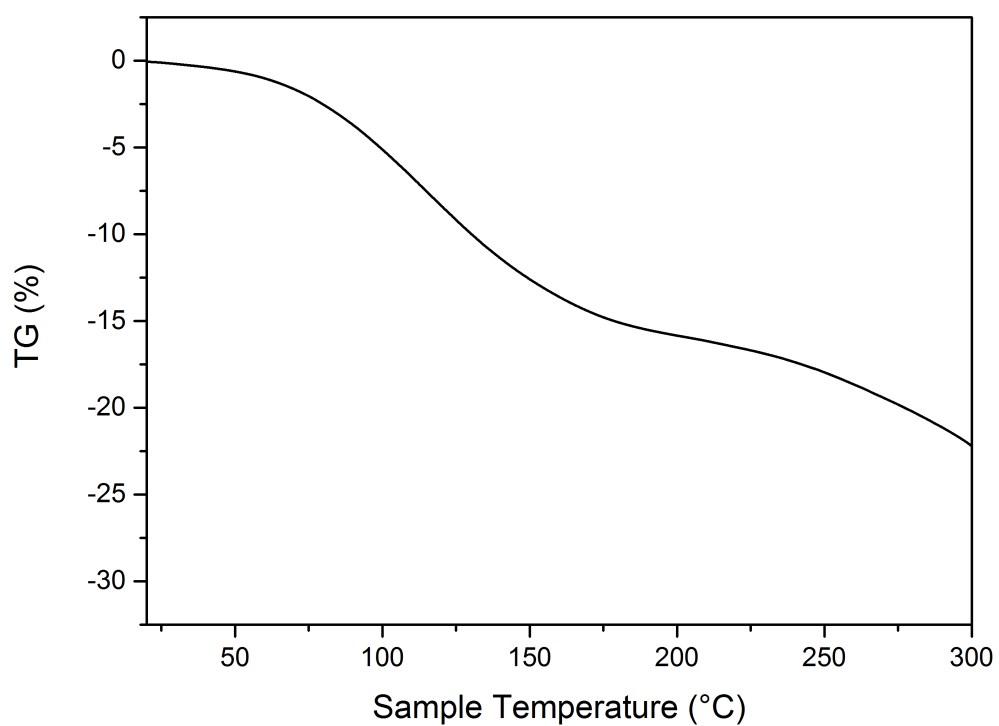

Figure S7: Plot of the thermogravimetric analysis of the mechanochemically synthesised NENU-5.
